# Supplementary material for: Prevalence of Intestinal Parasitic Infections and Associated Risk Factors among the First-Cycle Primary Schoolchildren in Sasiga District, Southwest Ethiopia
Source: J Parasitol Res. 2020 Mar 13;2020:8681247. doi: 10.1155/2020/8681247 (PMC7093910; doi:10.1155/2020/8681247)
Supplement: Supplementary 4 — Supplementary material file 4: STROBE Statement—Checklist of items that are included in the reports of this cross-sectional studies on the prevalence of IPIs among students in the first-cycle primary school in Sasiga District, southwest Ethiopia, 2018/2019. 22 STROBE checklists for cross-sectional studies were included here. [file 8681247.f4.docx]

**Supplementary** file 4 STROBE Statement—Checklist of items that are included in the reports of this ***cross-sectional studies***

on the prevalence of IPIsamong students in Sasiga first cycle Primary School, Sasiga District, south-west Ethiopia, 2018/19

|  | Item No | Recommendation | Page/paragraph |
| --- | --- | --- | --- |
| **Title and abstract** | 1 | (*a*) Indicate the study’s design with a commonly used term in the title or the abstract | Page 1/ line 6 of the abstract |
| (*b*) Provide in the abstract an informative and balanced summary of what was done and what was found | Page1/ Method and conclusion of the abstract |
| Introduction | | |  |
| Background/rationale | 2 | Explain the scientific background and rationale for the investigation being reported | Page 4/Background, Paragraph 6 |
| Objectives | 3 | State specific objectives, including any prespecified hypotheses | Page 4/Background, Paragraph 7 |
| Methods | | |  |
| Study design | 4 | Present key elements of study design early in the paper | Page 4/Method(Study design and Study area section  ), paragraph 1 |
| Setting | 5 | Describe the setting, locations, and relevant dates, including periods of recruitment, exposure, follow-up, and data collection | Page 4/Method(Study design and Study area section  ), paragraph 1 |
| Participants | 6 | (*a*) Give the eligibility criteria, and the sources and methods of selection of participants | Page 5/Methods (Study population and sample size determination section), paragraph 1. |
| Variables | 7 | Clearly define all outcomes, exposures, predictors, potential confounders, and effect modifiers. Give diagnostic criteria, if applicable | N/A |
| Data sources/ measurement | 8* | For each variable of interest, give sources of data and details of methods of assessment (measurement). Describe comparability of assessment methods if there is more than one group | *N/A* |
| Bias | 9 | Describe any efforts to address potential sources of bias | N/A |
| Study size | 10 | Explain how the study size was arrived at | Page 5/ Methods (Study population and sample size determination section), paragraph 1. |
| Quantitative variables | 11 | Explain how quantitative variables were handled in the analyses. If applicable, describe which groupings were chosen and why | N/A |
| Statistical methods | 12 | (*a*) Describe all statistical methods, including those used to control for confounding | Page 7/ Methods (data analysis section), paragraph 8. |
| (*b*) Describe any methods used to examine subgroups and interactions | N/A |
| (*c*) Explain how missing data were addressed | N/A |
| (*d*) If applicable, describe analytical methods taking account of sampling strategy | N/A |
| (*e*) Describe any sensitivity analyses | N/A |
| Results | | |  |
| Participants | 13* | (a) Report numbers of individuals at each stage of study—eg numbers potentially eligible, examined for eligibility, confirmed eligible, included in the study, completing follow-up, and analysed | Page7/Result, paragraph 1 |
| (b) Give reasons for non-participation at each stage | Page 7/Result, paragraph 1 |
| (c) Consider use of a flow diagram | N/A |
| Descriptive data | 14* | (a) Give characteristics of study participants (eg demographic, clinical, social) and information on exposures and potential confounders | Page8/Result, paragraph 1 |
| (b) Indicate number of participants with missing data for each variable of interest | N/A |
| Outcome data | 15* | Report numbers of outcome events or summary measures | N/A |
| Main results | 16 | (*a*) Give unadjusted estimates and, if applicable, confounder-adjusted estimates and their precision (eg, 95% confidence interval). Make clear which confounders were adjusted for and why they were included | Page 13/ Result(Logistic regression analysis (LRA) section), paragraph 1 |
| (*b*) Report category boundaries when continuous variables were categorized | N/A |
| (*c*) If relevant, consider translating estimates of relative risk into absolute risk for a meaningful time period | N/A |
| Other analyses | 17 | Report other analyses done—eg analyses of subgroups and interactions, and sensitivity analyses | N/A |
| Discussion | | |  |
| Key results | 18 | Summarise key results with reference to study objectives | Page20/Discussion, paragraph 2 |
| Limitations | 19 | Discuss limitations of the study, taking into account sources of potential bias or imprecision. Discuss both direction and magnitude of any potential bias | Page20/Discussion, paragraph 2 |
| Interpretation | 20 | Give a cautious overall interpretation of results considering objectives, limitations, multiplicity of analyses, results from similar studies, and other relevant evidence | Pages 20 to 21/ Discussion, paragraph 2, 3 and 4 |
| Generalisability | 21 | Discuss the generalisability (external validity) of the study results | Page 20 to 21/ Discussion, paragraph 2, 3 and 4 |
| Other information | | |  |
| Funding | 22 | Give the source of funding and the role of the funders for the present study and, if applicable, for the original study on which the present article is based | Page 23/ funding section |

N/A=not applicable
